# Supplementary material
Source: Springer Nature journal article supplement (https://www.springermedizin.de/resource/supplementary/12955_2009_613_MOESM6_ESM.pdf/9560836)

## Seattle Angina Exertional Capacity Scale Seattle Angina Anginal Frequency Scale

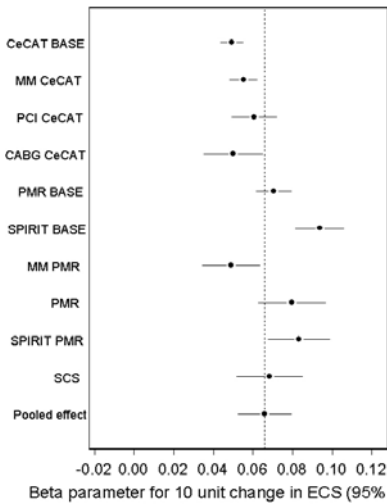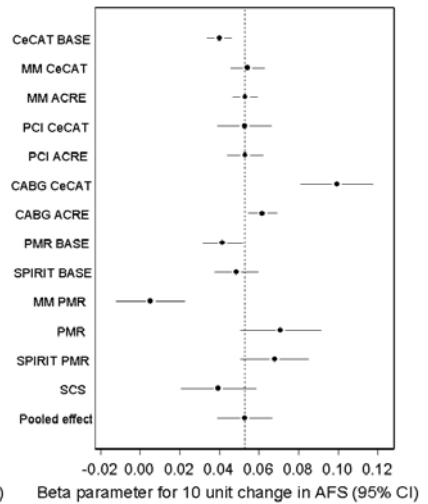

## Seattle Angina Anginal Stability Scale Seattle Angina Disease Perception Scale

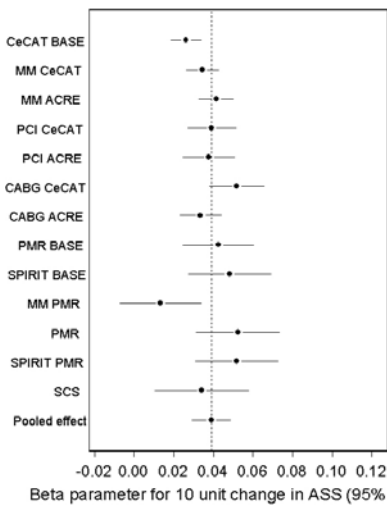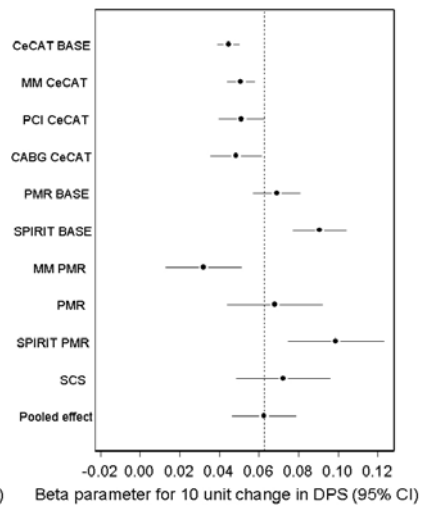

## Seattle Angina Treatment Satisfaction Scale

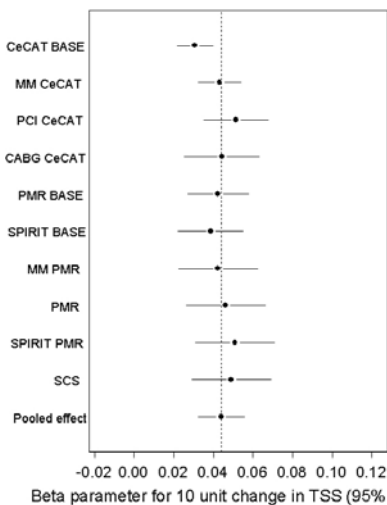

Supplement: MOESM6 [file 9560836]
